# Supplementary material for: Chemical vapor transport synthesis of one-dimensional V2PS10 and its application in miniaturized UV sensors
Source: Royal Society of Chemistry journal article supplement (doi:10.1039/d4ce00779d), 2024-12-03
Supplement: d4ce00779d1.pdf [file d4ce00779d1.pdf]

# Chemical Vapor Transport Synthesis of One-Dimensional $V_2PS_{10}$ and Its Application in Miniaturized UV Sensors

*Jinsu Kang<sup>a,†</sup>, Sooheon Cho<sup>a,†</sup>, Xiaojie Zhang<sup>a</sup>, Bom Lee<sup>a</sup>, Byung Joo Jeong<sup>a</sup>, Kyung Hwan Choi<sup>b</sup>, Jiho Jeon<sup>b</sup>, Sang Hoon Lee<sup>a</sup>, Jae-Hyuk Park<sup>a</sup>, Sang Hyuk Kim<sup>\*,a</sup>, Hak Ki Yu<sup>\*,c</sup>, and Jae-Young Choi<sup>\*,a,d</sup>*

<sup>a</sup>School of Advanced Science Materials and Engineering, Sungkyunkwan University, Suwon 16419, Republic of Korea

<sup>b</sup>SKKU Advanced Institute of Nanotechnology (SAINT), Sungkyunkwan University, Suwon 16419, Republic of Korea

<sup>c</sup>Department of Materials Science and Engineering & Department of Energy Systems Research, Ajou University, Suwon 16499, Republic of Korea

<sup>d</sup>KIST-SKKU Carbon-Neutral Research Center, Sungkyunkwan University, Suwon 16419, Republic of Korea

#: authors equally contributed

Corresponding authors e-mail:

sh47kim@skku.edu & hakkiyu@ajou.ac.kr & jy.choi@skku.edu

## TABLE OF CONTENTS

**Figure. S1** Morphology of  $V_2PS_{10}$  nanowire synthesized by various reaction condition.

**Figure. S2** The expanded XRD peaks of  $V_2PS_{10}$  powder under various synthesis conditions.

**Figure. S3** The result of Rietveld refinement of the XRD graph of the  $V_2PS_{10}$  powder by CVT method.

**Figure. S4** Morphology and atomic ratio of the  $V_2PS_{10}$  nanowires synthesized by CVT method.

**Figure. S5** Dispersion of the  $V_2PS_{10}$  nanowires with various solvent.

**Figure S6** Absorbance graph according to dielectric constant and surface tension of various solvents.

**Table. S1** Comparison of rise/decay time and on/off ratio of various 1D material-based UV sensors

## SUPPORTING FIGURES

### Morphology of $V_2PS_{10}$ nanowire synthesized by various reaction condition

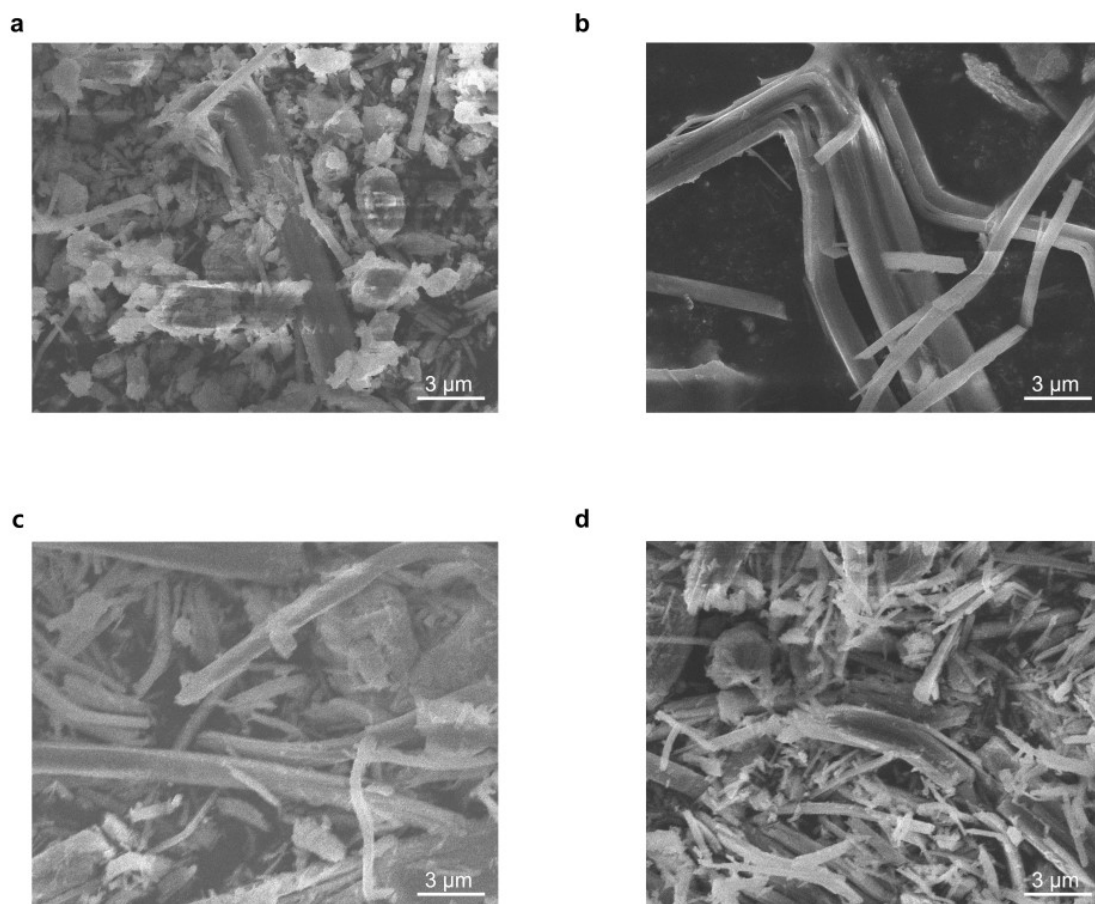

**Fig. S1** SEM image of  $V_2PS_{10}$  nanowire synthesized by various reaction condition. (a) Using  $VS_4$  as intermediate phase precursor instead of Vanadium precursor and heated to  $450^\circ C$  for 3 days. (b), (c), and (d) Using V, P and S as precursor. (b)  $500^\circ C$  for 3 days. (c)  $480^\circ C$  for 7 days. (d)  $500^\circ C$  for 7 days.

### The expanded XRD peaks of $V_2PS_{10}$ powder under various synthesis conditions

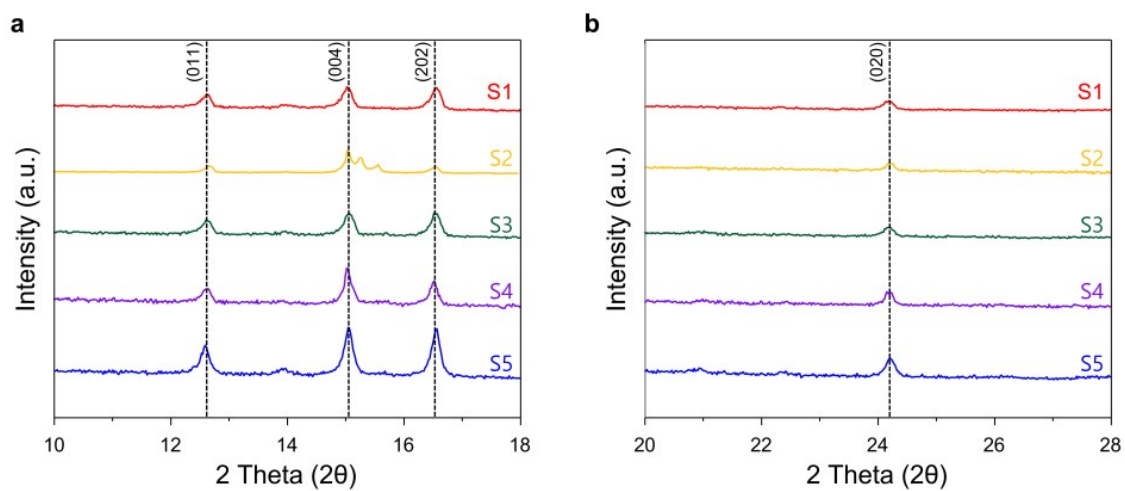

**Fig. S2** The expanded XRD peaks in Figure 2b. (a)  $10^\circ < 2\theta < 18^\circ$ . (b)  $20^\circ < 2\theta < 28^\circ$ .

The result of Rietveld refinement of the XRD graph of the  $V_2PS_{10}$  powder by CVT method

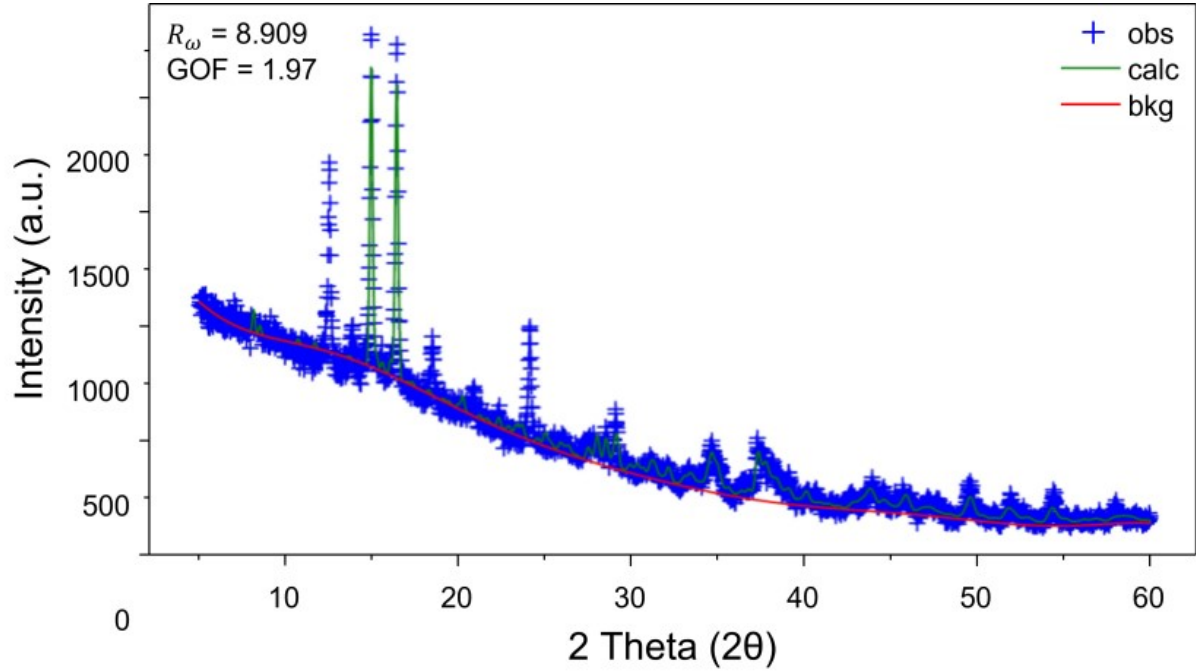

$$\otimes R_{\omega} = \sqrt{\frac{\sum_i \omega_i (y_{obs,i} - y_{calc,i})^2}{\sum_i \omega_i y_{obs,i}^2}},$$

$R_{\omega}$  = weighted residual factor

$$\otimes GOF = \frac{R_{\omega}}{R_{expected}} = \sqrt{\frac{\sum_i \omega_i (y_{obs,i} - y_{calc,i})^2}{N - P}},$$

$R_{expected}$  = The expected R value, which represents the ideal level of data fit.  
 $N$  = The total number of data points.  
 $P$  = The number of refined parameters.

**Fig. S3** The results of Rietveld refinement of the XRD graph under S5 condition.

### Morphology and atomic ratio of the $V_2PS_{10}$ nanowires synthesized by CVT method

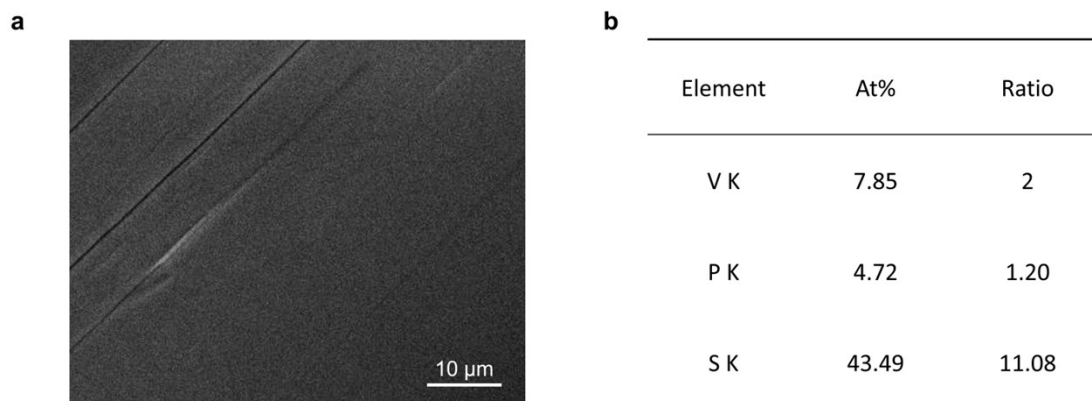

**Fig. S4** (a) SEM image of the  $V_2PS_{10}$  single crystal nanowire synthesized by CVT method. (b) The ratio of the elements obtained by EDS.

# Dispersion of the V<sub>2</sub>PS<sub>10</sub> nanowires with various solvent

| Material             | V <sub>2</sub> PS <sub>10</sub>                                                     |                                                                                     |                                                                                     |                                                                                     |                                                                                      |                                                                                       |                                                                                       |                                                                                       |
|----------------------|-------------------------------------------------------------------------------------|-------------------------------------------------------------------------------------|-------------------------------------------------------------------------------------|-------------------------------------------------------------------------------------|--------------------------------------------------------------------------------------|---------------------------------------------------------------------------------------|---------------------------------------------------------------------------------------|---------------------------------------------------------------------------------------|
| Sonication           | 3hr                                                                                 |                                                                                     |                                                                                     |                                                                                     |                                                                                      |                                                                                       |                                                                                       |                                                                                       |
| RPM                  | 6000                                                                                |                                                                                     |                                                                                     |                                                                                     |                                                                                      |                                                                                       |                                                                                       |                                                                                       |
| Solvent              | Toluen<br>e                                                                         | Chlorof<br>orm                                                                      | Aceton<br>e                                                                         | IPA                                                                                 | Ethanol                                                                              | DMF                                                                                   | NMP                                                                                   | DI                                                                                    |
| After Sonication     |    |    |    |    |    |    |    |    |
| After Centrifugation |   |   |   |   |   |   |   |   |
| Tyndall Effect       |  |  |  |  |  |  |  |  |

**Fig. S5** Tyndall effect of V<sub>2</sub>PS<sub>10</sub> solutions dispersed in various solvents.

### Absorbance graph according to dielectric constant and surface tension of various solvents

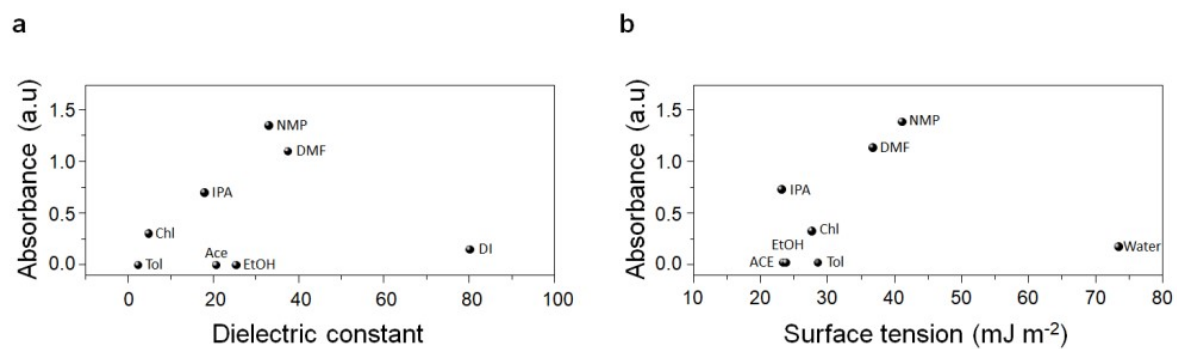

**Fig. S6** (a) Dielectric constant vs Absorbance graph of dispersed solvent. (b) Surface tension vs Absorbance graph of dispersed solvent.



### Comparison of rise/decay time and on/off ratio of various 1D material-based UV sensors

| material                         | year | rise time (ms) | decay time (ms) | on/off ratio | Ref.      |
|----------------------------------|------|----------------|-----------------|--------------|-----------|
| ZnS nanowire                     | 2017 | 90             | 70              | 19173        | 1         |
| WO <sub>3</sub>                  | 2023 | 75             | 69              | -            | 2         |
| CsCu <sub>2</sub> I <sub>3</sub> | 2021 | 160            | 320             | 3150         | 3         |
| ZnO nanowire                     | 2017 | 450            | 60              | 100          | 4         |
| TiO <sub>2</sub> nanowire        | 2018 | 400            | 100             | 2000         | 5         |
| V <sub>2</sub> PS <sub>10</sub>  | 2024 | 60.1           | 214.4           | 16395        | This work |

**Table. S1** Comparison of rise/decay time and on/off ratio of various 1D material-based UV sensors

#### Reference

- [1] Q. An, X. Meng, K. Xiong, Y. Qiu, Self-powered ZnS Nanotubes/Ag Nanowires MSM UV Photodetector with High On/Off Ratio and Fast Response Speed, *Sci. Rep.* 7 (2017) 4885.
- [2] A. Yadav, L. Goswami, P. Vashishtha, A. Sharma, P. Goswami, G. Gupta, Highly responsive WO<sub>3</sub> based UV-Vis photodetector, *Sensors Actuators A Phys.* 362 (2023) 114641.
- [3] X. Zhou, L. Zhang, Y. Huang, Z. Zhou, W. Xing, J. Zhang, F. Zhou, D. Zhang, F. Zhao, Enhanced Responsivity of CsCu<sub>2</sub>I<sub>3</sub> Based UV Detector with CuI Buffer-Layer Grown by Vacuum Thermal Evaporation, *Adv. Optical Mater.* 9 (2021) 2100889.

- [4] L. Li, H. Jiang, X. Han, Z. Zhan, H. Du, W. Lu, Z. Li, Z. Tao, Y. Fan, Optimizing growth of ZnO nanowire networks for high-performance UV detection, *Ceramics International* 43 (2017) 15978–15985.
- [5] Y. Zou, Y. Zhang, Y. Hu, H. Gu, Ultraviolet Detectors Based on Wide Bandgap Semiconductor Nanowire: A Review, *Sensors* 18 (2018) 2072.
